# Supplementary material for: Mapping of a responsible region for sex reversal upstream of Sox9 by production of mice with serial deletion in a genomic locus
Source: PubMed Central journal article supplement (PMC6269501; doi:10.1038/s41598-018-35746-0), 2018-11-30
Supplement: 41598_2018_35746_MOESM2_ESM.pdf [file 41598_2018_35746_MOESM2_ESM.pdf]

## Supplementary tables

### Mapping of a responsible region for sex reversal upstream of *Sox9* by production of mice with serial deletion in a genomic locus

Yuya Ogawa<sup>#, 1</sup>, Miho Terao<sup>#, 1</sup>, Satoshi Hara<sup>#, 1</sup>, Moe Tamano<sup>1</sup>, Haruka Okayasu<sup>1</sup>, Tomoko Kato<sup>§,1</sup> and Shuji Takada<sup>\*, 1</sup>

<sup>1</sup> Department of Systems BioMedicine, National Research Institute for Child Health and Development, Tokyo 157-8535, Japan

<sup>#</sup>These authors contributed equally to this work.

<sup>§</sup>Present address: Tokyo Metropolitan Institute of Medical Science, Regenerative Medicine Project, Tokyo 156-8506, Japan

<sup>\*</sup>Corresponding author: Shuji Takada (takada-s@ncchd.go.jp, 2-10-1 Okura, Setagaya, Tokyo 157-8535, Japan, Tel & Fax: +81-3-3417-2498).



**Table S2. Genotypes of F<sub>0</sub> mice obtained by injection of sgRNA2/6/7.**

| Mouse ID | Karyotype | Phenotypic sex | Indel |       |       | Deletion                 |                          |                          |
|----------|-----------|----------------|-------|-------|-------|--------------------------|--------------------------|--------------------------|
|          |           |                | F1/R1 | F2/R2 | F6/R6 | F1/R2<br>( $\Delta$ 7-2) | F2/R6<br>( $\Delta$ 2-6) | F1/R6<br>( $\Delta$ 7-6) |
| #41      | XY        | Male           | indel | indel | indel | ○                        |                          |                          |
| #42      | XY        | Male           | indel | indel | indel |                          | ○                        | ○                        |
| #43*     | XX        | Female         | ND    | ND    | ND    |                          |                          |                          |
| #44      | XX        | Female         | ND    | ND    | indel | ○                        |                          |                          |
| #45      | XX        | Female         | indel | indel | indel |                          |                          | ○                        |
| #46      | XY        | Female         | ND    | ND    | indel | ○                        |                          | ○                        |
| #47      | XY        | Male           | indel | indel | indel |                          |                          |                          |
| #48      | XY        | Female         | ND    | ND    | indel | ○                        |                          | ○                        |
| #49      | XX        | Female         | indel | ND    | ND    | ○                        |                          | ○                        |
| #50      | XY        | Male           | indel | indel | indel |                          |                          |                          |
| #51      | XY        | Male           | indel | indel | indel |                          |                          | ○                        |
| #52      | XX        | Female         | ND    | indel | indel |                          |                          |                          |
| #53      | XX        | Female         | indel | ND    | ND    |                          | ○                        |                          |
| #54      | XY        | Female         | ND    | ND    | ND    |                          |                          | ○                        |
| #55      | XY        | Male           | indel | indel | indel |                          |                          |                          |
| #56      | XY        | Male           | ND    | indel | indel |                          |                          |                          |
| #57      | XY        | Male           | ND    | ND    | indel | ○                        |                          |                          |

Columns below 'Indel' and 'Deletion' show pairs of PCR primers used for genotyping.

Parentheses designate deleted regions.

WT: no mutation observed; indel: indel was observed; ND: not detected by PCR amplification; ○: PCR product was identified; Blank: PCR product was not identified

Mice exhibiting XY sex reversal are highlighted in yellow.

\*PCR amplicon was not observed by any combinations of genotyping primers.

**Table S3. Germline transmission of serial deletion alleles.**

| sgRNA combination | F <sub>0</sub> mice | Genotype of F <sub>0</sub>                              | No. of F <sub>1</sub> genotyped | No. of F <sub>1</sub> mouse |                                                                                                                        |
|-------------------|---------------------|---------------------------------------------------------|---------------------------------|-----------------------------|------------------------------------------------------------------------------------------------------------------------|
|                   |                     |                                                         |                                 | WT                          | Deletion*                                                                                                              |
| sgRNA1/2/3/4/5/6  | #6                  | $\Delta 2\text{-}3/\Delta 4\text{-}6$                   | 7                               | 4                           | <b>1 (<math>\Delta 2\text{-}3</math>)</b> , 2 ( $\Delta 2\text{-}3$ ; $\Delta 4\text{-}6$ )                            |
|                   | #9                  | $\Delta 2\text{-}3/\Delta 3\text{-}6/\Delta 5\text{-}6$ | 8                               | 0                           | <b>3 (<math>\Delta 3\text{-}6</math>)</b> , 2 ( $\Delta 2\text{-}3$ ), 3 ( $\Delta 2\text{-}3$ ; $\Delta 3\text{-}6$ ) |
|                   | #16                 | $\Delta 2\text{-}6/\Delta 2\text{-}4$                   | 9                               | 1                           | <b>2 (<math>\Delta 2\text{-}4</math>)</b> , <b>5 (<math>\Delta 2\text{-}6</math>)</b>                                  |
|                   | #21                 | $\Delta 2\text{-}5$                                     | 7                               | 6                           | <b>1 (<math>\Delta 2\text{-}5</math>)</b>                                                                              |
|                   | #25                 | $\Delta 4\text{-}6$                                     | 5                               | 3                           | <b>2 (<math>\Delta 4\text{-}6</math>)</b>                                                                              |
|                   | #26**               | $\Delta 2\text{-}5$                                     | 9                               | 0                           | 2 ( $\Delta 2\text{-}5$ ), <b>7 (<math>\Delta 5\text{-}6</math>)</b>                                                   |
|                   | #33                 | $\Delta 2\text{-}3/\Delta 4\text{-}6$                   | 3                               | 2                           | 1 ( $\Delta 2\text{-}3$ )                                                                                              |
|                   | #34                 | $\Delta 2\text{-}4$                                     | 14                              | 11                          | 3 ( $\Delta 2\text{-}4$ )                                                                                              |
|                   | #35                 | $\Delta 5\text{-}6$                                     | 7                               | 5                           | 2 ( $\Delta 5\text{-}6$ )                                                                                              |
|                   | #37**               | $\Delta 3\text{-}4$                                     | 11                              | 5                           | 6 ( $\Delta 2\text{-}5$ )                                                                                              |
| sgRNA2/6/7        | #45                 | $\Delta 7\text{-}6$                                     | 9                               | 5                           | <b>4 (<math>\Delta 7\text{-}6</math>)</b>                                                                              |
|                   | #57                 | $\Delta 7\text{-}2$                                     | 10                              | 6                           | <b>4 (<math>\Delta 7\text{-}2</math>)</b>                                                                              |

\*Established deletion lines are shown in bold.

\*\*Deletion patterns observed at F<sub>1</sub> generation was not identified in F<sub>0</sub> mice. #26 and #37 are considered as mosaic individuals.
